# Supplementary material
Source: publisher figshare collection journal article supplement (https://acs.figshare.com/ndownloader/files/5176774)
Supplement: Supplementary file 1 [file 5176774]

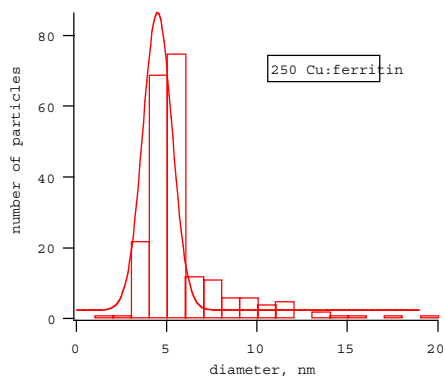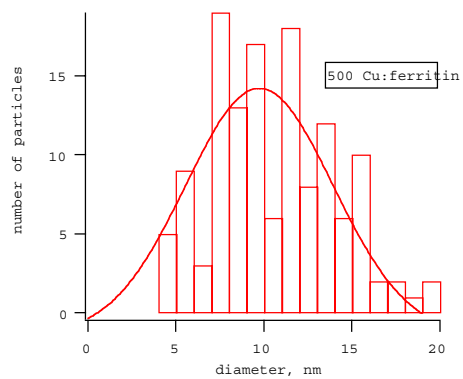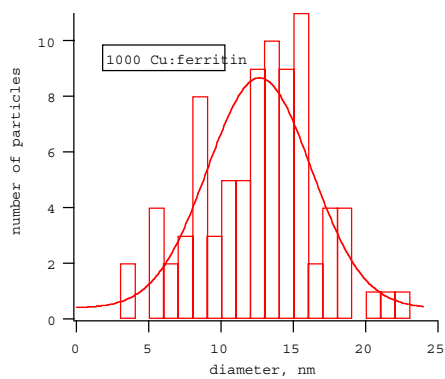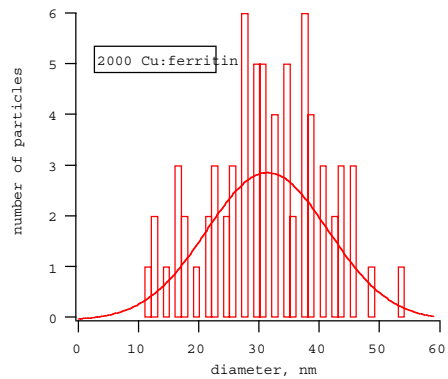

**S1.** Cu(0) particle size histograms as measured by TEM across four different loadings of Cu:ferritin.

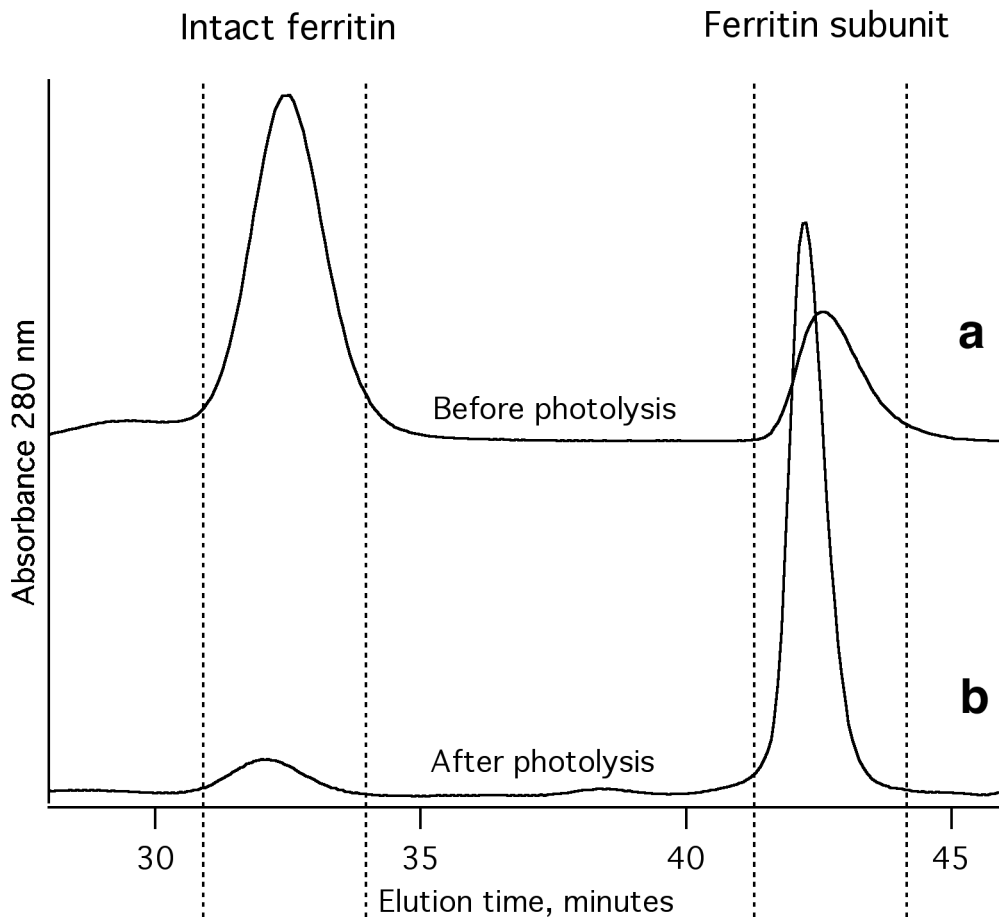

**S2.** Size exclusion chromatographs of ferritin (a) before photolytic reduction of Cu(II), (b) after photolytic reduction of Cu(II) to Cu(0) colloid, followed by subsequent oxidation of the colloid. The intact ferritin protein cage (elution time ~32-34 min) shows disassembly after the photolysis reactions, but the protein subunit (by SDS PAGE) appears to be unchanged.

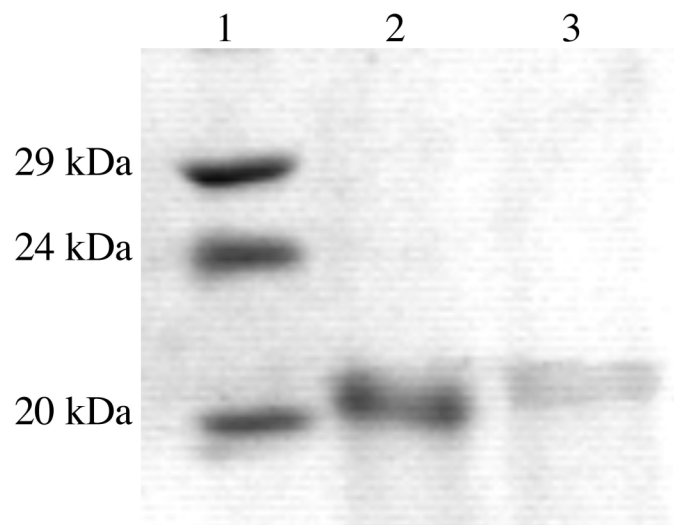

**S3.** SDS PAGE of ferritin (2) before and (3) after the photolytic production of Cu(0) colloids, with no purification of the reaction product. For (3), the colloid was allowed to oxidize before electrophoresis.
